# Supplementary material for: Surveillance, Isolation, and Genetic Characterization of Bat Herpesviruses in Zambia
Source: MDPI journal article supplement (doi:10.3390/v15061369), 2023-06-13
Supplement: s1 [file s1]

**Table S1 Primers used in this study**

| Primer          | Sequence (5'-3')                    | Purpose                        | Reference        |
|-----------------|-------------------------------------|--------------------------------|------------------|
| DFASA-F         | GTGTTCTGACTTYGCNAGYYTNTAYCC         | Screening<br>(semi-nested) PCR | [23]             |
| VYGA-nested-F   | ACGTGCAACGCGGTGTAYGGNKTNACNGG       |                                |                  |
| GDTD1B-R        | CGGCATGCGACAAACACGGAGTCNGTRTCNCCRTA |                                |                  |
| Strain82-GAP1-F | CCAGAGCTGAGTTTGCCAAC                | Nanopore-sequencing            | In this<br>study |
| Strain82-GAP1-R | AAAGTGCCACTAGACCCAAC                |                                |                  |
| Strain82-GAP2-F | TTGGACCACTATGGTGATGG                |                                |                  |
| Strain82-GAP2-R | TCTAACCTGACCAGGCAAGC                |                                |                  |
| Strain82-GAP3-F | TCTTAGGTGTGACTCAAACC                |                                |                  |
| Strain82-GAP3-R | GCCAGTAACTAGGAAGCACC                |                                |                  |

**Table S2 Reference sequences used in this study**

| Subfamily                | Virus                             | Accession No. |
|--------------------------|-----------------------------------|---------------|
| <i>Alfaherpesvirinae</i> | Anatid alphaherpesvirus 1         | NC_013036     |
|                          | Ateline alphaherpesvirus 1        | NC_034446     |
|                          | Beluga whale alphaherpesvirus 1   | NC_055166     |
|                          | Bovine alphaherpesvirus 2         | AF181249      |
|                          | Bovine alphaherpesvirus 2         | NC_043048     |
|                          | Bovine alphaherpesvirus 5         | NC_005261.3   |
|                          | Bovine herpesvirus type 1.1       | NC_063268     |
|                          | Bubaline alphaherpesvirus 1       | NC_043054     |
|                          | Canid alphaherpesvirus 1          | MW353126      |
|                          | Caprine alphaherpesvirus 1        | NC_043055     |
|                          | Cercopithecine alphaherpesvirus 2 | NC_006560     |
|                          | Cercopithecine alphaherpesvirus 9 | NC_002686.2   |
|                          | Cervid alphaherpesvirus 1         | NC_043056     |
|                          | Cervid alphaherpesvirus 3         | NC_055561     |
|                          | Chelonid alphaherpesvirus 5       | HQ878327.2    |
|                          | Columbid alphaherpesvirus 1       | NC_034266     |
|                          | Equid alphaherpesvirus 1          | NC_001491.2   |
|                          | Equid alphaherpesvirus 3          | NC_024771     |
|                          | Equid alphaherpesvirus 4          | NC_001844     |
|                          | Equid alphaherpesvirus 8          | KF434388      |
|                          | Equid alphaherpesvirus 9          | NC_011644     |
|                          | Equid herpesvirus 6               | MT012704      |
|                          | Falconid herpesvirus 1            | NC_024450     |
|                          | Felid alphaherpesvirus 1          | KR381779      |
|                          | Fruit bat alphaherpesvirus 1      | NC_024306     |
|                          | Gallid alphaherpesvirus 1         | NC_006623     |

|                          |                                                  |             |
|--------------------------|--------------------------------------------------|-------------|
|                          | Gallid alphaherpesvirus 2                        | KU744558    |
|                          | Gallid alphaherpesvirus 3                        | NC_002577   |
|                          | Human alphaherpesvirus 1                         | ON783216    |
|                          | Human alphaherpesvirus 1 strain 17               | NC_001806.2 |
|                          | Human alphaherpesvirus 2                         | MH697447    |
|                          | Human alphaherpesvirus 2 strain HG52             | NC_001798.2 |
|                          | Human alphaherpesvirus 3                         | NC_001348   |
|                          | Leporid alphaherpesvirus 4                       | NC_029311   |
|                          | Macacine alphaherpesvirus 1                      | NC_004812   |
|                          | Macropodid alphaherpesvirus 1                    | NC_029132   |
|                          | Macropodid alphaherpesvirus 2                    | MT900475    |
|                          | Meleagrid alphaherpesvirus 1                     | NC_002641   |
|                          | Papiine alphaherpesvirus 2                       | NC_007653   |
|                          | Phocid alphaherpesvirus 1                        | MH509440.2  |
|                          | Psittacid alphaherpesvirus 1                     | NC_005264   |
|                          | Saimiriine alphaherpesvirus 1                    | NC_01456    |
|                          | Spheniscid alphaherpesvirus 1                    | LT608136    |
|                          | Suid alphaherpesvirus 1                          | NC_006151   |
|                          | Testudinid alphaherpesvirus 3                    | NC_027916.2 |
|                          | Walrus alphaherpesvirus 1                        | LC532169    |
| <i>Betaherpesvirinae</i> | Aotine betaherpesvirus 1                         | NC_016447   |
|                          | Caviid betaherpesvirus 2                         | NC_020231   |
|                          | Cebine betaherpesvirus 1                         | NC_038260   |
|                          | Cercopithecine betaherpesvirus 5                 | NC_012783.2 |
|                          | Cynomolgus cytomegalovirus                       | NC_033176   |
|                          | Cynomolgus macaque cytomegalovirus strain Ottawa | NC_016154   |
|                          | Elephant endotheliotropic herpesvirus 4          | NC_028379   |
|                          | Elephant endotheliotropic herpesvirus 5          | NC_024696   |
|                          | Elephantid betaherpesvirus 1                     | NC_020474.2 |
|                          | Human betaherpesvirus 5                          | NC_006273.2 |
|                          | Human betaherpesvirus 6A                         | NC_001664.4 |
|                          | Human betaherpesvirus 6B                         | NC_000898   |
|                          | Human betaherpesvirus 7                          | NC_001716.2 |
|                          | Macaca nemestrina herpesvirus 7                  | NC_030200   |
|                          | Macacine betaherpesvirus 3                       | NC_006150   |
|                          | Murid betaherpesvirus 1                          | NC_004065   |
|                          | Murid betaherpesvirus 8                          | NC_019559.2 |
|                          | Murine roseolovirus                              | NC_033620   |
|                          | Panine betaherpesvirus 2                         | NC_003521   |
|                          | Papio ursinus cytomegalovirus                    | NC_027016   |
|                          | Rat cytomegalovirus strain Maastricht            | NC_002512.2 |
|                          | Saimiriine betaherpesvirus 4                     | NC_016448   |

|                           |                                                              |             |
|---------------------------|--------------------------------------------------------------|-------------|
|                           | Suid betaherpesvirus 2                                       | NC_022233   |
|                           | Tupaïid betaherpesvirus 1                                    | NC_002794   |
| <i>Gammaherpesvirinae</i> | Alcelaphine gammaherpesvirus 1                               | NC_002531   |
|                           | Alcelaphine gammaherpesvirus 2                               | NC_024382   |
|                           | Ateline gammaherpesvirus 3                                   | NC_001987   |
|                           | Bovine gammaherpesvirus 4                                    | NC_002665   |
|                           | Bovine gammaherpesvirus 6                                    | NC_024303   |
|                           | Callitrichine gammaherpesvirus 3                             | NC_004367   |
|                           | Callitrichine gammaherpesvirus 3                             | NC_004367   |
|                           | Colobine gammaherpesvirus 1 Hannover strain                  | MH932584    |
|                           | Common bottlenose dolphin gammaherpesvirus 1 strain Sarasota | NC_035117   |
|                           | Cricetid gammaherpesvirus 2                                  | NC_015049   |
|                           | Eptesicus fuscus gammaherpesvirus                            | NC_040615   |
|                           | Equid gammaherpesvirus 2 strain 275                          | HQ247750    |
|                           | Equid gammaherpesvirus 2 strain 2B                           | HQ247756    |
|                           | Equid gammaherpesvirus 2 strain 37                           | HQ247753    |
|                           | Equid gammaherpesvirus 2 strain 86/67                        | NC_001650.2 |
|                           | Equid gammaherpesvirus 2 strain ATCC                         | HQ247755    |
|                           | Equid gammaherpesvirus 2 strain G9/92                        | KM924294    |
|                           | Equid gammaherpesvirus 5 strain 2-141/67                     | NC_026421   |
|                           | Equid gammaherpesvirus 5 strain 281                          | GQ325593    |
|                           | Equid gammaherpesvirus 5 strain Archey                       | KC715730    |
|                           | Equid gammaherpesvirus 5 strain Chantilly Lake               | KC715732    |
|                           | Equid gammaherpesvirus 5 strain SJ                           | KC715731    |
|                           | Felis catus gammaherpesvirus 1                               | NC_028099   |
|                           | Harp seal herpesvirus                                        | NC_055139   |
|                           | Human gammaherpesvirus 4 AIL14 strain                        | MH837517    |
|                           | Human gammaherpesvirus 4 strain B95-8                        | NC_007605   |
|                           | Human gammaherpesvirus 8 strain GK18                         | NC_009333   |
|                           | Human gammaherpesvirus 8 VG-1 strain                         | GU233088    |
|                           | Human herpesvirus 4 type 2 strain AG876                      | NC_009334   |
|                           | Lymphocryptovirus Macaca/pfe-lcl-E3                          | NC_055142   |
|                           | Macaca fuscata rhadinovirus                                  | NC_007016   |
|                           | Macaca mulatta rhadinovirus NEPRC 159-05 strain              | GU233144    |
|                           | Macaca nemestrina rhadinovirus 2                             | NC_055141   |
|                           | Macacine gammaherpesvirus 4                                  | NC_006146   |
|                           | Macacine gammaherpesvirus 5                                  | NC_003401   |
|                           | Murid gammaherpesvirus 4                                     | NC_001826.2 |
|                           | Mustelid gammaherpesvirus 1                                  | NC_038266   |
|                           | Myotis gammaherpesvirus 8                                    | NC_029255   |
|                           | Myotis ricketti herpesvirus 1                                | JN692429    |
|                           | Myotis ricketti herpesvirus 2                                | JN692430    |

|                                                          |           |
|----------------------------------------------------------|-----------|
| Ovine gammaherpesvirus 2                                 | NC_007646 |
| Panine gammaherpesvirus 1                                | NC_038859 |
| Phascolarctid gammaherpesvirus 1                         | NC_055555 |
| Pongine gammaherpesvirus 2                               | NC_038860 |
| Porcine lymphotropic herpesvirus 1                       | NC_038264 |
| Porcine lymphotropic herpesvirus 2                       | NC_038265 |
| Porcine lymphotropic herpesvirus 3                       | NC_055234 |
| Retroperitoneal fibromatosis-associated herpesvirus      | NC_055135 |
| Rhinolophus gammaherpesvirus 1                           | NC_040539 |
| Saimiriine gammaherpesvirus 2                            | NC_00135  |
| Tursiops truncatus gammaherpesvirus V1977 MIA0501 strain | KX494870  |
| Vombatid gammaherpesvirus 1                              | NC_055554 |
| Wood mouse herpesvirus                                   | NC_055233 |

---

**Table S3 Highest amino acid identities for partial DPOL genes detected by screening**

| Subfamily                 | Virus                                          | % identity | Closest virus                                                   | Acession No. |
|---------------------------|------------------------------------------------|------------|-----------------------------------------------------------------|--------------|
| <i>Betaherpesvirinae</i>  | <i>Macronycteris vittatus</i> /Zambia/64/2018  | 64.4       | <i>Miniopterus natalensis</i> /South Africa/UP5701/2015         | AYC44580     |
| <i>Betaherpesvirinae</i>  | <i>Macronycteris vittatus</i> /Zambia/50/2018  | 55.0       | <i>Miniopterus natalensis</i> /South Africa/UP6250/2016         | AYC44579     |
| <i>Betaherpesvirinae</i>  | <i>Macronycteris vittatus</i> /Zambia/20/2018  | 58.3       | <i>Miniopterus schreibersii</i> /Spain/psc-13/2002or2004or2007  | AMY98771     |
| <i>Betaherpesvirinae</i>  | <i>Macronycteris vittatus</i> /Zambia/36/2018  | 58.3       | <i>Miniopterus schreibersii</i> /Spain/psc-13/2002or2004or2007  | AMY98771     |
| <i>Betaherpesvirinae</i>  | <i>Macronycteris vittatus</i> /Zambia/41/2018  | 60.0       | <i>Miniopterus schreibersii</i> /Spain/psc-13/2002or2004or2007  | AMY98771     |
| <i>Betaherpesvirinae</i>  | <i>Macronycteris vittatus</i> /Zambia/46/2018  | 58.3       | <i>Miniopterus schreibersii</i> /Spain/psc-13/2002or2004or2007  | AMY98771     |
| <i>Betaherpesvirinae</i>  | <i>Macronycteris vittatus</i> /Zambia/101/2018 | 60.0       | <i>Miniopterus schreibersii</i> /Spain/psc-13/2002or2004or2007  | AMY98771     |
| <i>Betaherpesvirinae</i>  | <i>Macronycteris vittatus</i> /Zambia/104/2018 | 60.0       | <i>Miniopterus schreibersii</i> /Spain/psc-13/2002or2004or2007  | AMY98771     |
| <i>Betaherpesvirinae</i>  | <i>Rousettus aegyptiacus</i> /Zambia/10/2018   | 100        | <i>Rousettus aegyptiacus</i> /South Africa/UP5647/2015          | AYC44561     |
| <i>Betaherpesvirinae</i>  | <i>Rousettus aegyptiacus</i> /Zambia/11/2018   | 96.6       | <i>Rousettus aegyptiacus</i> /South Africa/UP6435/2016          | AYC44560     |
| <i>Betaherpesvirinae</i>  | <i>Macronycteris vittatus</i> /Zambia/37/2018  | 45.6       | Phacochoerus africanus cytomegalovirus 1                        | AAP42116     |
| <i>Betaherpesvirinae</i>  | <i>Macronycteris vittatus</i> /Zambia/49/2018  | 45.6       | Phacochoerus africanus cytomegalovirus 1                        | AAP42116     |
| <i>Betaherpesvirinae</i>  | <i>Macronycteris vittatus</i> /Zambia/106/2018 | 45.6       | Phacochoerus africanus cytomegalovirus 1                        | AAP42116     |
| <i>Betaherpesvirinae</i>  | <i>Rousettus aegyptiacus</i> /Zambia/3/2018    | 60.5       | <i>Plecotus austriacus</i> /Spain/psc-23/2004or2007             | AMY98781     |
| <i>Betaherpesvirinae</i>  | <i>Rousettus aegyptiacus</i> /Zambia/6/2018    | 60.5       | <i>Plecotus austriacus</i> /Spain/psc-23/2004or2007             | AMY98781     |
| <i>Betaherpesvirinae</i>  | <i>Macronycteris vittatus</i> /Zambia/114/2018 | 60.5       | <i>Plecotus austriacus</i> /Spain/psc-23/2004or2007             | AMY98781     |
| <i>Betaherpesvirinae</i>  | <i>Macronycteris vittatus</i> /Zambia/126/2018 | 60.5       | <i>Pteropus giganteus</i> /Bangladesh/PgHV-10/2006-2010         | AGW27603     |
| <i>Betaherpesvirinae</i>  | <i>Macronycteris vittatus</i> /Zambia/84/2018  | 75.0       | <i>Rhinolophus ferrumequinum</i> /Spain/psc-24/2004or2007or2008 | AMY98782     |
| <i>Gammaherpesvirinae</i> | <i>Macronycteris vittatus</i> /Zambia/22/2018  | 86.0       | <i>Rhinolophus blythi</i> /China/RB-13YF84/2013                 | ALH21090     |
| <i>Gammaherpesvirinae</i> | <i>Macronycteris vittatus</i> /Zambia/30/2018  | 84.2       | <i>Rhinolophus blythi</i> /China/RB-13YF84/2013                 | ALH21090     |
| <i>Gammaherpesvirinae</i> | <i>Macronycteris vittatus</i> /Zambia/38/2018  | 87.7       | <i>Rhinolophus blythi</i> /China/RB-13YF84/2013                 | ALH21090     |
| <i>Gammaherpesvirinae</i> | <i>Macronycteris vittatus</i> /Zambia/39/2018  | 82.5       | <i>Hipposideros pomona</i> /China/HP-11HN110/2011               | ALH21054     |
| <i>Gammaherpesvirinae</i> | <i>Macronycteris vittatus</i> /Zambia/80/2018  | 86.0       | <i>Rhinolophus blythi</i> /China/RB-13YF84/2013                 | ALH21090     |
| <i>Gammaherpesvirinae</i> | <i>Macronycteris vittatus</i> /Zambia/82/2018  | 84.2       | <i>Hipposideros pomona</i> /China/HP-11HN110/2011               | ALH21054     |
| <i>Gammaherpesvirinae</i> | <i>Hipposideros caffer</i> /Zambia/112/2018    | 87.7       | <i>Hipposideros pomona</i> /China/HP-11HN110/2011               | ALH21054     |
| <i>Gammaherpesvirinae</i> | <i>Macronycteris vittatus</i> /Zambia/21/2018  | 77.2       | <i>Hipposideros pomona</i> /China/HP-11HN110/2011               | ALH21054     |

|                           |                                               |      |                                                      |          |
|---------------------------|-----------------------------------------------|------|------------------------------------------------------|----------|
| <i>Gammaherpesvirinae</i> | <i>Macronycteris vittatus</i> /Zambia/23/2018 | 75.4 | <i>Hipposideros pomona</i> /China/HP-11HN110/2011    | ALH21054 |
| <i>Gammaherpesvirinae</i> | <i>Macronycteris vittatus</i> /Zambia/28/2018 | 77.2 | <i>Hipposideros pomona</i> /China/HP-11HN110/2011    | ALH21054 |
| <i>Gammaherpesvirinae</i> | <i>Macronycteris vittatus</i> /Zambia/29/2018 | 77.2 | <i>Hipposideros pomona</i> /China/HP-11HN110/2011    | ALH21054 |
| <i>Gammaherpesvirinae</i> | <i>Macronycteris vittatus</i> /Zambia/42/2018 | 75.4 | <i>Hipposideros pomona</i> /China/HP-11HN110/2011    | ALH21054 |
| <i>Gammaherpesvirinae</i> | <i>Macronycteris vittatus</i> /Zambia/45/2018 | 75.4 | <i>Hipposideros pomona</i> /China/HP-11HN110/2011    | ALH21054 |
| <i>Gammaherpesvirinae</i> | <i>Macronycteris vittatus</i> /Zambia/55/2018 | 77.2 | <i>Hipposideros pomona</i> /China/HP-11HN110/2011    | ALH21054 |
| <i>Gammaherpesvirinae</i> | <i>Macronycteris vittatus</i> /Zambia/92/2018 | 77.2 | <i>Hipposideros pomona</i> /China/HP-11HN110/2011    | ALH21054 |
| <i>Gammaherpesvirinae</i> | <i>Macronycteris vittatus</i> /Zambia/94/2018 | 77.2 | <i>Hipposideros pomona</i> /China/HP-11HN110/2011    | ALH21054 |
| <i>Gammaherpesvirinae</i> | <i>Macronycteris vittatus</i> /Zambia/96/2018 | 77.2 | <i>Hipposideros pomona</i> /China/HP-11HN110/2011    | ALH21054 |
| <i>Gammaherpesvirinae</i> | <i>Macronycteris vittatus</i> /Zambia/25/2018 | 68.4 | <i>Miniopterus schreibersi</i> /China/MS-11HN95/2011 | ALH21055 |
| <i>Gammaherpesvirinae</i> | <i>Rousettus aegyptiacus</i> /Zambia/4/2018   | 100  | <i>Rousettus aegyptiacus</i> /Hungary/XXX/2007       | ACY82599 |
| <i>Gammaherpesvirinae</i> | <i>Rousettus aegyptiacus</i> /Zambia/7/2018   | 82.5 | <i>Acerodon celebensis</i> /Indonesia/IFB13-28/2013  | BBA93921 |
| <i>Gammaherpesvirinae</i> | <i>Rousettus aegyptiacus</i> /Zambia/15/2018  | 100  | <i>Rousettus aegyptiacus</i> /Hungary/XXX/2007       | ACY82599 |

Individual herpesviruses detected from bats are named as follows: bat species of origin/country of identification/common name/year of collection.

**Table S4 Identity comparison of each viral protein among *Macronycteris gammaherpesvirus 1* strains and *rhinolophus gammaherpesvirus 1***

| Protein | Amino acid sequence identity (%) between |                   | Product or predicted function                                                                       |
|---------|------------------------------------------|-------------------|-----------------------------------------------------------------------------------------------------|
|         | MaGHV1 and RGHV1                         | Strains 80 and 82 |                                                                                                     |
| BM1     | -                                        | N/A               | homolog of CASP8 and FADD-like apoptosis regulator                                                  |
| BM2     | -                                        | N/A               | hypothetical protein                                                                                |
| BM3     | 41                                       | 60.1              | homolog of EHV2 E3 membrane protein E3                                                              |
| BM4     | 42.1                                     | 94.4              | homolog of E3 ubiquitin-protein ligase and RGHV1 ORF4 MIR-like membrane protein                     |
| BM5     | 62.2                                     | 94                | homolog of EHV2 E4 apoptosis regulator BALF1                                                        |
| ORF6    | 71.1                                     | 99.3              | single-stranded DNA binding protein                                                                 |
| ORF7    | 60.7                                     | 97.9              | DNA packaging terminase subunit 2                                                                   |
| ORF8    | 72                                       | 92.9              | glycoprotein B                                                                                      |
| ORF9    | 78.4                                     | 98.2              | DNA polymerase catalytic subunit                                                                    |
| BM6     | 34.5                                     | 100               | bcl-2-like protein                                                                                  |
| BM7     | 58.8                                     | 100               | homolog of EHV2 E6 membrane protein BILF1                                                           |
| ORF10   | 34.3                                     | 98                | homolog of EHV2 ORF10 protein G10                                                                   |
| ORF11   | 53.9                                     | 96.8              | homolog of EHV2 ORF11 virion protein G11                                                            |
| BM8     | 39                                       | 95.5              | homolog of bovine herpesvirus 6 Bov8 putative major envelope glycoprotein, RGHV1 ORF18 glycoprotein |
| ORF17   | 49                                       | 99                | capsid maturation protease                                                                          |
| ORF17.5 | 42.7                                     | 98.2              | capsid scaffold protein                                                                             |
| ORF18   | 55.9                                     | 100               | homolog of EHV2 ORF18 protein UL79                                                                  |
| ORF19   | 61.2                                     | 98.7              | homolog of EHV2 ORF19 DNA packaging tegument protein UL25                                           |
| ORF20   | 71.4                                     | 99.1              | homolog of EHV2 ORF20 nuclear protein UL24                                                          |
| ORF21   | 58.7                                     | 98.6              | thymidine kinase                                                                                    |
| ORF22   | 61.2                                     | 96                | glycoprotein H                                                                                      |
| ORF23   | 53.4                                     | 96.9              | homolog of EHV2 ORF23 tegument protein UL88                                                         |
| ORF24   | 58.8                                     | 99.7              | homolog of EHV2 ORF24 protein UL87                                                                  |
| ORF25   | 78.1                                     | 99.9              | major capsid protein                                                                                |
| ORF26   | 74                                       | 99                | capsid triplex subunit 2                                                                            |
| ORF27   | 29.5                                     | 91                | homolog of EHV2 ORF27 envelope glycoprotein 48                                                      |
| ORF28   | 36.8                                     | 95.1              | homolog of EHV2 ORF28 envelope glycoprotein 150                                                     |
| ORF29a  | 70.2                                     | 97.4              | DNA packaging terminase subunit 1                                                                   |
| ORF29b  | 76.3                                     | 98.8              | DNA packaging terminase subunit 1                                                                   |
| ORF30   | 53.6                                     | 95.2              | homolog of EHV2 ORF30 protein UL91                                                                  |
| ORF31   | 61.3                                     | 98.6              | homolog of EHV2 ORF31 protein UL92                                                                  |

|        |       |      |                                                           |
|--------|-------|------|-----------------------------------------------------------|
| ORF32  | 51.8  | 96   | homolog of EHV2 ORF32 DNA packaging tegument protein UL17 |
| ORF33  | 47.1  | 95.1 | homolog of EHV2 ORF33 tegument protein UL16               |
| ORF34  | 63.8  | 98.1 | homolog of EHV2 ORF34 protein UL95                        |
| ORF35  | 63.5  | 99.3 | homolog of EHV2 ORF35 tegument protein UL14               |
| ORF36  | 60.5  | 96.7 | tegument serine/threonine protein kinase                  |
| ORF37  | 68    | 99.3 | deoxyribonuclease                                         |
| ORF38  | 38.6  | 90.4 | myristylated tegument protein                             |
| ORF39  | 63.6  | 98.9 | glycoprotein M                                            |
| ORF40a | 43.64 | 95.8 | helicase-primase subunit                                  |
| ORF40b | 46.86 | 100  | helicase-primase subunit                                  |
| ORF42  | 62.8  | 100  | homolog of EHV2 ORF42 tegument protein UL7                |
| ORF43  | 80.2  | 100  | capsid portal protein                                     |
| ORF44  | 78.6  | 100  | helicase-primase helicase subunit                         |
| ORF45  | 47.1  | 89.5 | homolog of EHV2 ORF45 tegument protein G45                |
| ORF46  | 75.8  | 97.2 | uracil-DNA glycosylase                                    |
| ORF47  | 48.6  | 78.2 | glycoprotein L                                            |
| ORF48  | 43.2  | 97   | homolog of EHV2 ORF48 tegument protein G48                |
| ORF49  | 42.1  | 97.9 | homolog of EHV2 ORF49 tegument protein G49                |
| ORF50  | 37.3  | 93.3 | protein Rta                                               |
| BM9    | 43.6  | 93.6 | hypothetical protein, homolog of RGHV1 ORF53              |
| BM10   | -     | 98.5 | hypothetical protein                                      |
| BM11   | 50    | 83   | homolog of EHV2 E7A envelope glycoprotein 42              |
| BM12   | 42.9  | 52.6 | hypothetical protein, homolog of RGHV1 ORF57              |
| ORF52  | 53.2  | 94.7 | homolog of EHV2 ORF52 virion protein G52                  |
| ORF53  | 71.9  | 97.7 | glycoprotein N                                            |
| ORF54  | 59    | 96.5 | dUTPase                                                   |
| ORF55  | 78.7  | 99.5 | homolog of EHV2 ORF55 tegument protein UL51               |
| ORF56  | 67.6  | 98.8 | helicase-primase primase subunit                          |
| ORF57  | 61.7  | 95.5 | multifunctional expression regulator                      |
| ORF58  | 58.2  | 95   | homolog of EHV2 ORF58 envelope protein UL43               |
| ORF59  | 48.6  | 96.5 | DNA polymerase processivity subunit                       |
| ORF60  | 80.7  | 98.3 | ribonucleotide reductase subunit 2                        |
| ORF61  | 63.4  | 96.6 | ribonucleotide reductase subunit 1                        |
| ORF62  | 62.7  | 98.1 | capsid triplex subunit 1                                  |
| ORF63  | 50.2  | 96.7 | homolog of EHV2 ORF63 tegument protein UL37               |
| ORF64  | 48.2  | 96.5 | large tegument protein                                    |
| ORF65  | 42.9  | 93.9 | small capsid protein                                      |
| ORF66  | 50.6  | 96.5 | homolog of EHV2 ORF66 protein UL49                        |



|        |      |      |                                                   |
|--------|------|------|---------------------------------------------------|
| ORF67  | 74.8 | 98.9 | nuclear egress membrane protein                   |
| ORF67A | 65.9 | 96.6 | homolog of EHV2 ORF67A DNA packaging protein UL33 |
| ORF68  | 59.9 | 98.6 | envelope glycoprotein, DNA packaging protein UL32 |
| ORF69  | 67.7 | 100  | nuclear egress lamina protein                     |
| ORF70  | 71   | 99.6 | thymidylate synthase                              |
| BM13   | -    | 88.2 | hypothetical protein                              |
| ORF73  | 30.9 | N/A  | nuclear antigen LANA-1                            |
| ORF74  | 47.5 | 100  | homolog of EHV2 ORF74 membrane protein G74        |
| ORF75  | 54.2 | 98.5 | homolog of EHV2 ORF75 tegument protein G75        |
| BM14   | -    | 99   | hypothetical protein                              |
| BM15   | -    | 98.4 | hypothetical protein                              |
| BM16   | -    | 100  | hypothetical protein                              |

-: No significant similarity was found by BLAST analyses.

Abbreviations: N/A, not analyzed; MaGHV1, *Macronycteris gammaherpesvirus 1*; RGHV1; *rhinolophus gammaherpesvirus 1*; EHV2, *equine gammaherpesvirus 2*.

**Table S5 Predicted protein coding regions in the genome of *Macronycteris gammaherpesvirus 1* strain**

**80**

| Gene  | Contig | Location (nucleotides) | Strand | Size (no. of amino acids) | Product or predicted function                                                   |
|-------|--------|------------------------|--------|---------------------------|---------------------------------------------------------------------------------|
| BM1   | None   | None                   | None   | None                      | homolog of CASP8 and FADD-like apoptosis regulator                              |
| BM2   | None   | None                   | None   | None                      | hypothetical protein                                                            |
| BM3   | 1      | 926-1,999              | +      | 357                       | homolog of EHV2 E3 membrane protein E3                                          |
| BM4   | 1      | 2,910-3,074            | -      | 54                        | homolog of E3 ubiquitin-protein ligase and RGHV1 ORF4 MIR-like membrane protein |
| BM5   | 1      | 3,442-3,999            | +      | 185                       | homolog of EHV2 E4 apoptosis regulator BALF1                                    |
| ORF6  | 1      | 4,201-7,599            | +      | 1,132                     | single-stranded DNA binding protein                                             |
| ORF7  | 1      | 7,669-9,717            | +      | 682                       | DNA packaging terminase subunit 2                                               |
| ORF8  | 1      | 9,733-12,282           | +      | 849                       | glycoprotein B                                                                  |
| ORF9  | 1      | 12,553-15,558          | +      | 1,001                     | DNA polymerase catalytic subunit                                                |
| BM6   | 1      | 15,593-16,105          | -      | 170                       | bcl-2-like protein                                                              |
| BM7   | 1      | 16,303-17,406          | +      | 367                       | homolog of EHV2 E6 membrane protein BILF1                                       |
| ORF10 | 1      | 17,450-18,847          | +      | 465                       | homolog of EHV2 ORF10 protein G10                                               |
| ORF11 | 1      | 18,907-20,142          | +      | 411                       | homolog of EHV2 ORF11 virion protein G11                                        |

|         |   |               |   |       |                                                                                                     |
|---------|---|---------------|---|-------|-----------------------------------------------------------------------------------------------------|
| BM8     | 2 | 364-2,019     | - | 551   | homolog of bovine herpesvirus 6 Bov8 putative major envelope glycoprotein, RGHV1 ORF18 glycoprotein |
| ORF17   | 2 | 2,159-3,739   | - | 526   | capsid maturation protease                                                                          |
| ORF17.5 | 2 | 2,159-3,010   | - | 284   | capsid scaffold protein                                                                             |
| ORF18   | 2 | 3,732-4,508   | + | 258   | homolog of EHV2 ORF18 protein UL79                                                                  |
| ORF19   | 2 | 4,505-6,127   | - | 540   | homolog of EHV2 ORF19 DNA packaging tegument protein UL25                                           |
| ORF20   | 2 | 5,991-6,695   | - | 234   | homolog of EHV2 ORF20 nuclear protein UL24                                                          |
| ORF21   | 2 | 6,694-8,310   | + | 538   | thymidine kinase                                                                                    |
| ORF22   | 2 | 8,310-10,535  | + | 741   | glycoprotein H                                                                                      |
| ORF23   | 2 | 10,532-11,725 | - | 397   | homolog of EHV2 ORF23 tegument protein UL88                                                         |
| ORF24   | 2 | 11,780-13,972 | - | 730   | homolog of EHV2 ORF24 protein UL87                                                                  |
| ORF25   | 2 | 13,977-18,110 | + | 1,377 | major capsid protein                                                                                |
| ORF26   | 2 | 18,130-19,032 | + | 300   | capsid triplex subunit 2                                                                            |
| ORF27   | 2 | 19,033-19,473 | + | 146   | homolog of EHV2 ORF27 envelope glycoprotein 48                                                      |
| ORF28   | 2 | 19,538-19,789 | + | 83    | homolog of EHV2 ORF28 envelope glycoprotein 150                                                     |
| ORF29a  | 2 | 24,132-25,292 | - | 386   | DNA packaging terminase subunit 1                                                                   |
| ORF29b  | 2 | 19,879-20,922 | - | 347   | DNA packaging terminase subunit 1                                                                   |
| ORF30   | 2 | 21,057-21,311 | + | 84    | homolog of EHV2 ORF30 protein UL91                                                                  |
| ORF31   | 2 | 21,224-21,907 | + | 227   | homolog of EHV2 ORF31 protein UL92                                                                  |
| ORF32   | 2 | 21,853-23,208 | + | 451   | homolog of EHV2 ORF32 DNA packaging tegument protein UL17                                           |
| ORF33   | 2 | 23,201-24,367 | + | 388   | homolog of EHV2 ORF33 tegument protein UL16                                                         |
| ORF34   | 2 | 25,291-26,259 | + | 322   | homolog of EHV2 ORF34 protein UL95                                                                  |
| ORF35   | 2 | 26,246-26,716 | + | 156   | homolog of EHV2 ORF35 tegument protein UL14                                                         |
| ORF36   | 2 | 26,613-27,914 | + | 433   | tegument serine/threonine protein kinase                                                            |
| ORF37   | 2 | 27,917-29,371 | + | 484   | deoxyribonuclease                                                                                   |
| ORF38   | 2 | 29,326-29,517 | + | 63    | myristylated tegument protein                                                                       |
| ORF39   | 2 | 29,584-30,717 | - | 377   | glycoprotein M                                                                                      |
| ORF40a  | 2 | 30,828-32,261 | + | 477   | helicase-primase subunit                                                                            |
| ORF40b  | 2 | 32,289-32,819 | + | 176   | helicase-primase subunit                                                                            |
| ORF42   | 2 | 32,814-33,629 | - | 271   | homolog of EHV2 ORF42 tegument protein UL7                                                          |
| ORF43   | 2 | 33,616-35,319 | - | 567   | capsid portal protein                                                                               |
| ORF44   | 2 | 35,285-37,651 | + | 788   | helicase-primase helicase subunit                                                                   |
| ORF45   | 2 | 37,705-38,607 | - | 300   | homolog of EHV2 ORF45 tegument protein G45                                                          |
| ORF46   | 2 | 38,609-39,367 | - | 252   | uracil-DNA glycosylase                                                                              |
| ORF47   | 2 | 39,330-39,788 | - | 152   | glycoprotein L                                                                                      |
| ORF48   | 2 | 39,886-41,319 | - | 477   | homolog of EHV2 ORF48 tegument protein G48                                                          |

|        |      |               |      |       |                                                   |
|--------|------|---------------|------|-------|---------------------------------------------------|
| ORF49  | 2    | 41,680-42,564 | -    | 294   | homolog of EHV2 ORF49 tegument protein G49        |
| ORF50  | 2    | 42,709-44,280 | +    | 523   | protein Rta                                       |
| BM9    | 2    | 44,414-44,719 | +    | 101   | hypothetical protein, homolog of RGHV1 ORF53      |
| BM10   | 2    | 44,978-45,385 | +    | 135   | hypothetical protein                              |
| BM11   | 2    | 45,498-46,175 | +    | 225   | homolog of EHV2 E7A envelope glycoprotein 42      |
| BM12   | 2    | 46,185-47,003 | +    | 272   | hypothetical protein, homolog of RGHV1 ORF57      |
| ORF52  | 2    | 47,017-47,421 | -    | 134   | homolog of EHV2 ORF52 virion protein G52          |
| ORF53  | 2    | 47,476-47,736 | -    | 86    | glycoprotein N                                    |
| ORF54  | 2    | 47,826-48,695 | +    | 289   | dUTPase                                           |
| ORF55  | 2    | 48,764-49,417 | -    | 217   | homolog of EHV2 ORF55 tegument protein UL51       |
| ORF56  | 2    | 49,390-51,957 | +    | 855   | helicase-primase primase subunit                  |
| ORF57  | 2    | 52,162-53,589 | +    | 475   | multifunctional expression regulator              |
| ORF58  | 2    | 54,452-55,489 | -    | 345   | homolog of EHV2 ORF58 envelope protein UL43       |
| ORF59  | 2    | 55,498-56,727 | -    | 409   | DNA polymerase processivity subunit               |
| ORF60  | 2    | 56,889-57,806 | -    | 305   | ribonucleotide reductase subunit 2                |
| ORF61  | 2    | 57,834-60,149 | -    | 771   | ribonucleotide reductase subunit 1                |
| ORF62  | 2    | 60,173-61,174 | -    | 333   | capsid triplex subunit 1                          |
| ORF63  | 2    | 61,185-63,968 | +    | 927   | homolog of EHV2 ORF63 tegument protein UL37       |
| ORF64  | 2    | 63,973-70,950 | +    | 2,325 | large tegument protein                            |
| ORF65  | 2    | 70,964-71,464 | -    | 166   | small capsid protein                              |
| ORF66  | 2    | 71,475-72,785 | -    | 436   | homolog of EHV2 ORF66 protein UL49                |
| ORF67  | 2    | 72,692-73,531 | -    | 279   | nuclear egress membrane protein                   |
| ORF67A | 2    | 73,594-73,863 | -    | 89    | homolog of EHV2 ORF67A DNA packaging protein UL33 |
| ORF68  | 2    | 73,966-75,348 | +    | 460   | envelope glycoprotein, DNA packaging protein UL32 |
| ORF69  | 2    | 75,350-76,213 | +    | 287   | nuclear egress lamina protein                     |
| ORF70  | 2    | 76,279-77,157 | -    | 292   | thymidylate synthase                              |
| BM13   | 2    | 77,382-77,693 | +    | 103   | hypothetical protein                              |
| ORF73  | None | None          | None | Non   | nuclear antigen LANA-1                            |
| ORF74  | 3    | 488-1,462     | +    | 324   | homolog of EHV2 ORF74 membrane protein G74        |
| ORF75  | 3    | 1,625-5,698   | -    | 1,357 | homolog of EHV2 ORF75 tegument protein G75        |
| BM14   | 3    | 5,732-6,061   | +    | 109   | hypothetical protein                              |
| BM15   | 3    | 6,387-6,980   | +    | 197   | hypothetical protein                              |
| BM16   | 3    | 7,578-8,081   | +    | 167   | hypothetical protein                              |
